# Supplementary material for: Computational Basis for On-Demand Production of Diversified Therapeutic Phage Cocktails
Source: PubMed Central journal article supplement (PMC7426155; doi:10.1128/msystems.00659-20), 2020-08-11

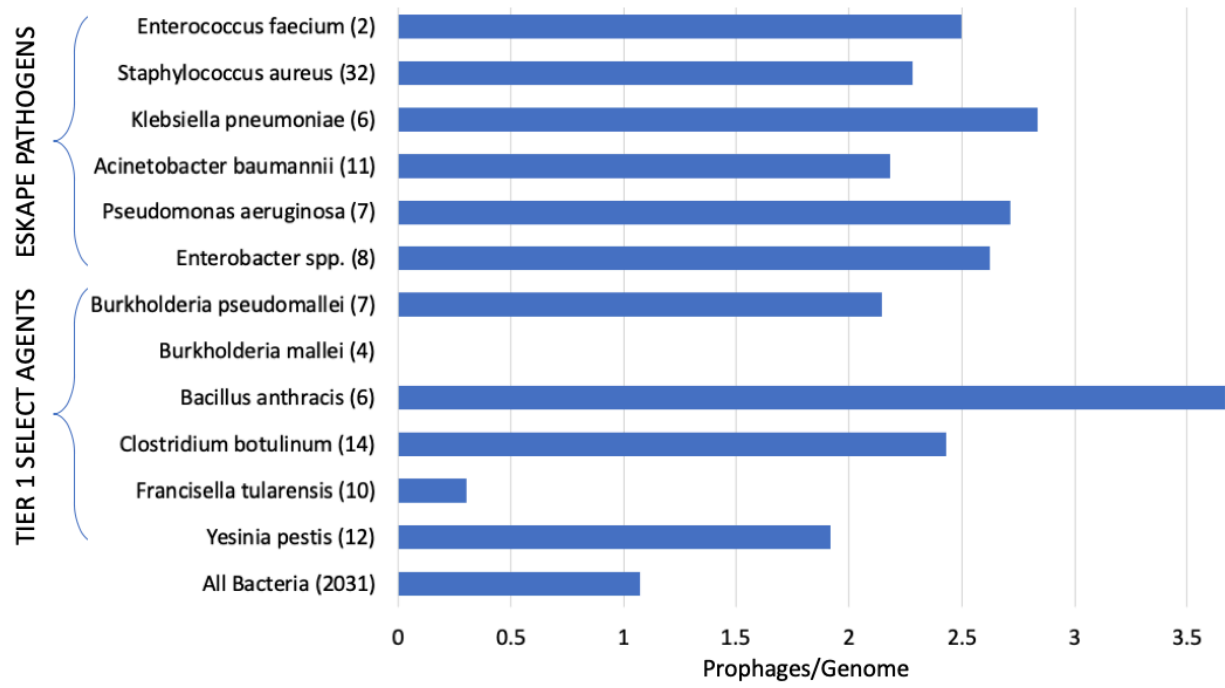

Supplement: mSystems.00659-20-sf008.pdf [file mSystems.00659-20-sf008.pdf]
